# Supplementary material for: Using a Fine-tuned Large Language Model for Symptom-based Depression Evaluation
Source: Research Square preprint supplement (doi:10.21203/rs.3.rs-6555767/v1), 2025-05-12
Supplement: Supplementary file 1 [file 20e6007aeb76be6e2f8f550e.pdf]

## Supplementary Material

### **Towards Precision Psychiatry: Using a Fine-tuned Large Language Model for Symptom-based Depression Evaluation.**

Samantha Weber, PhD<sup>1,2\*</sup>, Nicolas Deperrois, PhD<sup>3</sup>, Robert Heun, MD<sup>1,2</sup>, Laura Frühschütz, MD<sup>1,2</sup>, Anna Monn, MSc<sup>1,2</sup>, Stephanie Homan, PhD<sup>1,4</sup>, Andrea Häfliger, MSc<sup>1,4</sup>, Erich Seifritz, MD<sup>1,2</sup>, Tobias Kowatsch, PhD<sup>5,6,7</sup>, Birgit Kleim, PhD<sup>1,4</sup>, Sebastian Olbrich, MD<sup>1,2\*</sup>,  
MULTICAST consortium<sup>a</sup>

Author affiliations:

1 Psychiatric University Hospital Zurich, Department of Adult Psychiatry and Psychotherapy, Psychiatric University Clinic Zurich, 8032 Zürich, Switzerland

2 Faculty of Medicine, University of Zurich, 8050 Zürich, Switzerland

3 Department of Quantitative Biomedicine, University of Zürich, 8050 Zürich, Switzerland

4 Department of Psychology, University of Zurich, 8052 Zürich, Switzerland.

5 Institute for Implementation Science in Health Care, University of Zurich, Zurich, Switzerland

6 School of Medicine, University of St. Gallen, St. Gallen, Switzerland

7 Department of Management, Technology, and Economics, ETH Zurich, Zurich, Switzerland

<sup>a</sup> <https://www.multicast.uzh.ch/en.html>

\*Correspondence:

Samantha Weber, University Hospital of Psychiatry, Zurich, Lenggstrasse 31, 8031 Zurich, Switzerland; [samantha.weber@bli.uzh.ch](mailto:samantha.weber@bli.uzh.ch)

Sebastian Olbrich, University Hospital of Psychiatry, Zurich, Lenggstrasse 31, 8031 Zurich, Switzerland; [sebastian.olbrich@bli.uzh.ch](mailto:sebastian.olbrich@bli.uzh.ch)

## Procedures

Within the framework of a larger study on the identification predictive markers for suicidal thoughts and behavior in a transdiagnostic cohort following discharge from inpatient psychiatric care (<https://www.multicast.uzh.ch/en.html>), patients underwent a full day of assessment before their discharge from the hospital. The assessment included a set of questionnaires on general health, mood and suicidal thoughts and behaviours, the Montgomery-Åsberg Depression Rating Scale (MADRS<sup>1</sup>) interview, a resting-state electroencephalography (EEG) measurement and an interview on positive, negative and neutral memories, as well as autobiographical memory task<sup>2</sup> while under EEG, as well as an interview on intrusive memories in patients with a history of suicide attempts. Patients then received instructions for the use of an app for ecological momentary assessments (EMA<sup>3</sup>) after discharge. During the first and the fourth week after discharge, the patients are prompted 5 times a day with a set of questionnaires to answer. Patients returned to a follow-up visits after the EMA data collection has been completed. During the follow-up visit, the baseline study procedures were repeated.

## Demographic Information

The patients interviewed included 27 females, 15 males, and 2 non-binary individuals, with a mean age of 36 years. Individual diagnoses, age, and gender are provided in Supplementary Table 1, while individual medication details are listed in Supplementary Table 2.

**Supplementary Table 1. Age, gender and diagnoses of individual patients from the dataset.**

| ID | Age | Gender     | Diag1  | Diag2  | Diag3  | Diag4 | Diag5 | Diag6 | Diag7 | Diag8 | Diag9 |
|----|-----|------------|--------|--------|--------|-------|-------|-------|-------|-------|-------|
| 1  | 26  | m          | F61    | F12.1  |        |       |       |       |       |       |       |
| 2  | 52  | f          | F33.2  | F60.31 | F10.2  |       |       |       |       |       |       |
| 3  | 26  | f          | F43.1  |        |        |       |       |       |       |       |       |
| 4  | 63  | f          | F33.2  |        |        |       |       |       |       |       |       |
| 5  | 46  | m          | F33.2  |        |        |       |       |       |       |       |       |
| 6  | 25  | f          | F33.1  |        |        |       |       |       |       |       |       |
| 7  | 31  | m          | F33.2  | F60.31 |        |       |       |       |       |       |       |
| 8  | 47  | f          | F33.2  | F43.1  |        |       |       |       |       |       |       |
| 9  | 33  | m          | F33.2  | F15.2  | F13.2  | F10.1 | F14.1 | F90.0 | F43.1 | F50.9 | F17.2 |
| 10 | 27  | f          | F32.2  | F42.0  | Z73    |       |       |       |       |       |       |
| 11 | 23  | f          | F10.2  | F10.3  | F12.1  | F33.2 |       |       |       |       |       |
| 12 | 27  | m          | F32.2  | F65.4  | F98.88 | F90.0 | F84.5 |       |       |       |       |
| 13 | 49  | m          | F33.2  | F41.1. | F61    |       |       |       |       |       |       |
| 14 | 45  | f          | F33.1  | G35.9  |        |       |       |       |       |       |       |
| 15 | 22  | m          | F32.3  | F90.0  | F43.1  |       |       |       |       |       |       |
| 16 | 25  | f          | F33.2  | F60.31 | F90.0  |       |       |       |       |       |       |
| 17 | 41  | m          | F33.0  |        |        |       |       |       |       |       |       |
| 18 | 52  | f          | F43.1  |        |        |       |       |       |       |       |       |
| 19 | 30  | m          | F33.3  | F42.2  | F84.5  |       |       |       |       |       |       |
| 20 | 47  | f          | F33.2  |        |        |       |       |       |       |       |       |
| 21 | 54  | m          |        |        |        |       |       |       |       |       |       |
| 22 | 23  | f          | F33.2  | F43.1  | F61    | F40.1 |       |       |       |       |       |
| 23 | 25  | f          | F33.2. | F42.2  |        |       |       |       |       |       |       |
| 24 | 24  | non-binary | F33.1  |        |        |       |       |       |       |       |       |

**(Continuation) Supplementary Table 1. Age, gender and diagnoses of individual patients from the dataset.**

|    |    |            |                 |        |        |       |        |  |  |  |  |
|----|----|------------|-----------------|--------|--------|-------|--------|--|--|--|--|
| 25 | 54 | f          | F33.            |        |        |       |        |  |  |  |  |
| 26 | 19 | f          | F33.1           | Z73    | F45.40 |       |        |  |  |  |  |
| 27 | 23 | non-binary | F43.1           | F60.31 | F90.0  |       |        |  |  |  |  |
| 28 | 31 | f          | F31.4           | F60.5  | F84.5  |       |        |  |  |  |  |
| 29 | 39 | m          | F33.1           | F60.31 | F10.1  | F12.1 | F17.1  |  |  |  |  |
| 30 | 21 | f          | F13.2           | F60.31 | F33.2  | F12.2 | F90.0  |  |  |  |  |
| 31 | 30 | f          | F33.2           | F50.0  | F10.1  |       |        |  |  |  |  |
| 32 | 56 | f          | F33.1           | G81.1  | G40.1  |       |        |  |  |  |  |
| 33 | 32 | m          | F25.1           | F90.0  | F10.1  |       |        |  |  |  |  |
| 34 | 20 | f          | F90.0           | F60.31 |        |       |        |  |  |  |  |
| 35 | 54 | f          | F32.2           | F10.0  | F10.2  |       |        |  |  |  |  |
| 36 | 30 | f          | F43.1           | F32.1  | F90.0  |       |        |  |  |  |  |
| 37 | 28 | f          | F31.3           |        |        |       |        |  |  |  |  |
| 38 | 52 | m          | F33.2           | F60.8  |        |       |        |  |  |  |  |
| 39 | 64 | m          | F33.2           | F61    | F14.2  | F11.2 |        |  |  |  |  |
| 40 | 56 | f          | F33.1           | F13.0  | Z73    | F90.0 | M54.86 |  |  |  |  |
| 41 | 28 | f          |                 |        |        |       |        |  |  |  |  |
| 42 | 24 | m          |                 |        |        |       |        |  |  |  |  |
| 43 | 25 | f          | 6B41<br>(cPTSD) | F33.1  |        |       |        |  |  |  |  |
| 44 | 35 | f          | F43.1           | F90.0  | F12.7  | F10.1 |        |  |  |  |  |

**Supplementary Table 2. Medication of individual patients from the dataset.** IDs with *a* and *b* correspond to the different timepoints with *a* = Baseline measurement and *b* = follow-up measurement.

| ID  | Med             | Dos1      | Med2              | Dos2          | Med3          | Dos3   | Med4      | Dos4  | Med5 | Dos5 | Med6 |
|-----|-----------------|-----------|-------------------|---------------|---------------|--------|-----------|-------|------|------|------|
| 1a  | Nihil           |           |                   |               |               |        |           |       |      |      |      |
| 1b  | Nihil           |           |                   |               |               |        |           |       |      |      |      |
| 2a  | Etiltox         | 200mg     | Sequase Ret.      | 50mg          | Sertalin      | 150mg  |           |       |      |      |      |
| 2b  | Zoloft          | 200mg     | Sequase           | smallest dose | Elitox        | 1 Pill | Metamizol | 1TL   |      |      |      |
| 3   | Trittico        | 50mg      |                   |               |               |        |           |       |      |      |      |
| 4a  | Sertralin       | 200mg     |                   |               |               |        |           |       |      |      |      |
| 4b  | Sertralin       | 200mg     |                   |               |               |        |           |       |      |      |      |
| 5a  | Duloxetin       | 90mg      |                   |               |               |        |           |       |      |      |      |
| 5b  | Duloxetin       | 60 mg     |                   |               |               |        |           |       |      |      |      |
| 6   | Venlafaxin Ret. | 225mg     |                   |               |               |        |           |       |      |      |      |
| 7   | Nihil           |           |                   |               |               |        |           |       |      |      |      |
| 8   | Nihil           |           |                   |               |               |        |           |       |      |      |      |
| 9a  | Concerta ret.   | 90mg      | Trittico          | 250mg         | Venlafaxin    | 300mg  |           |       |      |      |      |
| 9b  | Concerta        | 90mg      | Trittico          | 250mg         | Venlafaxin    | 300mg  |           |       |      |      |      |
| 10  | Cipralext       | 20mg      | Aripiprazol Mepha | 15 mg         |               |        |           |       |      |      |      |
| 11a | Cipralext       | 15mg      | Sequase           | 25mg          |               | 0      |           |       |      |      |      |
| 11b | Circaplex       | 10mg      | Sequase on demand | 25 mg         | Vitamin B12   | 1 Pill |           |       |      |      |      |
| 12a | Quilonorm ret.  | 12.2 mmol | Sequase           | 100 mg        |               |        |           |       |      |      |      |
| 12b | Ritalin         | 40mg      | Oxidant           | 20mg          |               |        |           |       |      |      |      |
| 13a | Venlafaxin Ret. | 112,5 mg  |                   |               |               |        |           |       |      |      |      |
| 13b | Venlafaxin Ret. | 112,5 mg  | Sequase           | on demand     |               |        |           |       |      |      |      |
| 14a | Cipralext       | 15mg      | Escitalopram      | 15mg          |               |        |           |       |      |      |      |
| 14b | Escitalopram    | 10mg      |                   |               |               |        |           |       |      |      |      |
| 15  | Cipralext       | 20mg      | Trittico          | 50mg          |               |        |           |       |      |      |      |
| 16  | Cipralext       | 30 mg     | Concerta          | 36mg          | Trittico Ret. | 150mg  | Trittico  | 100mg |      |      |      |

**(Continuation) Supplementary Table 2. Medication of individual patients from the dataset.** IDs with *a* and *b* correspond to the different timepoints with *a* = Baseline measurement and *b* = follow-up measurement.

| ID  | Med            | Dos1   | Med2       | Dos2  | Med3            | Dos3   | Med4         | Dos4  | Med5                | Dos5     | Med6     |
|-----|----------------|--------|------------|-------|-----------------|--------|--------------|-------|---------------------|----------|----------|
| 17  | Trittico Ret.  | 50 mg  |            |       |                 |        |              |       |                     |          |          |
| 18a | Aripiprazol    | 10mg   | Selincro   | 54mg  | Sequase XR Ret  | 150mg  | Trittico Ret | 150mg | Trittico            | 150mg    | Euthyrox |
| 18b | Aripiprazol    | 10mg   | Selincro   | 54mg  | Sequase XR Ret  | 150mg  | Trittico Ret | 150mg | Trittico            | 150mg    | Euthyrox |
| 19  | Olanzapin      | 5mg    | Reagila    | 4.5mg | Sertralin       | 250 mg | Trittico     | 50 mg |                     |          |          |
| 20  | Trittico Ret.  | 49.5mg | Trittico   | 50 mg | Velnafaxin Ret. | 150mg  |              |       |                     |          |          |
| 21a | Fluoxetin      | 60mg   | Olanzapin  | 10mg  |                 |        |              |       |                     |          |          |
| 21b | Fluoxetin      | 60mg   | Olanzapin  | 10mg  |                 |        |              |       |                     |          |          |
| 22a | Aripiprazol    | 5mg    | Duloxetin  | 90mg  | Tretinac        | 5mg    |              |       |                     |          |          |
| 22b | Aripiprazol    | 5mg    | Duloxetin  | 90mg  | Tretinac        | 5mg    |              |       |                     |          |          |
| 23a | Sequase        | 25mg   | Sertralin  | 150mg | Surmontil       | 50mg   |              |       |                     |          |          |
| 23b | Sertralin      | 150mg  |            |       |                 |        |              |       |                     |          |          |
| 24  | Sequase XR Ret | 100mg  | Sertralin  | 100mg |                 |        |              |       |                     |          |          |
| 25a | Cipralext      | 10mg   | Trittico   | 50mg  |                 |        |              |       |                     |          |          |
| 25b | Cipralext      | 10mg   |            |       |                 |        |              |       |                     |          |          |
| 26  | Fluoxetin      | 30mg   |            |       |                 |        |              |       |                     |          |          |
| 27a | Ritalin        | 20mg   |            |       |                 |        |              |       |                     |          |          |
| 27b | Ritalin        | 20mg   |            |       |                 |        |              |       |                     |          |          |
| 28a | Lamictal       | 250mg  | Sertralin  | 150mg | Trittico        | 150mg  |              |       |                     |          |          |
| 28b | Lamictal       | 300mg  | Sertralin  | 150mg | Trittico        | 50mg   |              |       |                     |          |          |
| 29a | Sequase        | 50mg   | Venlafaxin | 150mg | Redormin        | 250mg  |              |       |                     |          |          |
| 29b | Sequase        | 50mg   | Venlafaxin | 150mg | Redormin        | 250mg  |              |       |                     |          |          |
| 30  | Duloxetin      | 60mg   | Lamictal   | 50mg  | Trittico        | 50mg   | Redormin     | 500mg | Xanax               | 1mg      |          |
| 31a | Redormin       | 500mg  | Sequase    | 25mg  | Sertralin       | 150mg  |              |       |                     |          |          |
| 31b | Sequase        | 25mg   | Sertralin  | 150mg |                 |        |              |       |                     |          |          |
| 32  | Redormin       | 500mg  | Neurontin  | 400mg | Trittico        | 50mg   | Venlafaxin   | 225mg |                     |          |          |
| 33a | Aripiprazol    | 15mg   | Brintellix | 20mg  | Elvanse         | 40mg   | Lamictal     | 200mg | Quilonorm           | 18,3mmol | Sequase  |
| 33b | Aripiprazol    | 15mg   | Brintellix | 20mg  | Elvanse         | 40mg   | Lamictal     | 200mg | Lithium (Quilonorm) | 18.3mmol |          |

**(Continuation) Supplementary Table 2. Medication of individual patients from the dataset.** IDs with *a* and *b* correspond to the different timepoints with *a* = Baseline measurement and *b* = follow-up measurement.

| ID  | Med                              | Dos1      | Med2           | Dos2  | Med3           | Dos3  | Med4                         | Dos4 | Med5    | Dos5 | Med6 |
|-----|----------------------------------|-----------|----------------|-------|----------------|-------|------------------------------|------|---------|------|------|
| 34  | Concerta                         | 18mg      |                |       |                |       |                              |      |         |      |      |
| 35a | CIPRAL<br>EX                     | 20mg      | Mirtazap<br>in | 15mg  |                |       |                              |      |         |      |      |
| 35b | CIPRAL<br>EX                     | 30mg      |                |       |                |       |                              |      |         |      |      |
| 36  | Nihil                            |           |                |       |                |       |                              |      |         |      |      |
| 37  | Lithium                          | 450<br>mg |                |       |                |       |                              |      |         |      |      |
| 38  | Duloxeti<br>n                    | 90mg      | Trittico       | 350mg |                |       |                              |      |         |      |      |
| 39a | Ketamin<br>nasal                 | 34.29 mg  | Dipipero<br>n  | 40mg  | Sequase        | 25mg  | Ciprallex                    | 10mg | Subutex | 8mg  |      |
| 39b | Ketamin<br>nasal                 | 34.29 mg  | Dipipero<br>n  | 40mg  | Sequase        | 25mg  | Ciprallex                    | 10mg | Subutex | 8mg  |      |
| 40  | Venlafax<br>in Viatris<br>ER Ret | 150mg     | Elvanse        | 50mg  | Trittico       | 50mg  | Calcimag<br>on D3<br>500/800 |      |         |      |      |
| 41  | Nihil                            |           |                |       |                |       |                              |      |         |      |      |
| 42  | Nihil                            |           |                |       |                |       |                              |      |         |      |      |
| 43  | Nihil                            |           |                |       |                |       |                              |      |         |      |      |
| 44  | ARIPIPR<br>AZOL                  | 25mg      | VALDO<br>XAN   | 50mg  | WELLB<br>UTRIN | 300mg |                              |      |         |      |      |

## MADRS Interview

Instructions translated from the German version that were used by the investigators.

**Supplementary Table 3. MADRS Interview Instructions.**

| Topic                         | Instructions                                                                                                                                                                                                                                          | Scoring                                                                                                                                                                                                                                                                                                                                                                                  |
|-------------------------------|-------------------------------------------------------------------------------------------------------------------------------------------------------------------------------------------------------------------------------------------------------|------------------------------------------------------------------------------------------------------------------------------------------------------------------------------------------------------------------------------------------------------------------------------------------------------------------------------------------------------------------------------------------|
| 0: Apparent sadness           | This item includes despondency, dejection, and despair expressed through speech, facial expression, and posture. Assess based on severity and the inability to be cheered up.                                                                         | 0: No sadness.<br>1:<br>2: Appears dejected but can be cheered up easily.<br>3:<br>4: Seems sad and unhappy most of the time.<br>5:<br>6: Looks sad and unhappy all the time. Extreme dejection.                                                                                                                                                                                         |
| 2: Inner tension              | Includes the patient's description of a depressed mood, whether visible or not, including discouragement, dejection, feelings of helplessness, and hopelessness. Assess based on severity, duration, and ability to be influenced by external events. | 0: Occasional sadness appropriate to circumstances.<br>1:<br>2: Feels sad or dejected but can be cheered up easily.<br>3:<br>4: Constant sadness and gloom but still influenced by external circumstances.<br>5:<br>6: Persistent, unchanging sadness, dejection, or hopelessness.                                                                                                       |
| 3: Sleep disturbances         | Includes a vague sense of discomfort, irritability, restlessness, inner excitement up to anxiety and panic. Assess based on severity, frequency, duration, and extent of seeking reassurance.                                                         | 0: Sleeps as usual.<br>1:<br>2: Mild difficulty falling asleep. Superficial, restless sleep. Slightly reduced sleep duration.<br>3:<br>4: Sleep reduced or interrupted by at least 2 hours.<br>5:<br>6: Sleeps less than 2-3 hours.                                                                                                                                                      |
| 4: Loss of appetite           | Includes the feeling of having less appetite compared to normal. Assess based on the severity of appetite loss or how much one has to force themselves to eat.                                                                                        | 0: Normal or increased appetite.<br>1:<br>2: Slightly reduced appetite.<br>3:<br>4: No appetite. Food does not taste good.<br>5:<br>6: Must be persuaded to eat.                                                                                                                                                                                                                         |
| 5: Difficulties concentrating | Includes difficulties in concentrating, ranging from simple trouble gathering thoughts to a complete inability to focus. Assess based on severity, frequency, and extent of the impairment.                                                           | 0: No concentration difficulties.<br>1:<br>2: Occasional trouble gathering thoughts.<br>3:<br>4: Difficulty concentrating and holding a thought. Affects reading or conversations.<br>5:<br>6: Unable to read or hold a conversation without difficulty.                                                                                                                                 |
| 6: Lassitude                  | Includes difficulties in initiating activities or sluggishness in starting and completing everyday tasks.                                                                                                                                             | 0: Almost no difficulty starting activities. No sluggishness.<br>1:<br>2: Difficulty starting an activity.<br>3:<br>4: Trouble starting simple routine activities, completing them only with effort.<br>5:<br>6: Complete lack of initiative. Unable to do anything without assistance.                                                                                                  |
| 7: Emotional numbness         | Includes a subjective feeling of reduced interest in surroundings or activities that previously brought joy. The ability to respond to circumstances or other people with appropriate feelings is diminished.                                         | 0: Normal interest in surroundings or other people.<br>1:<br>2: Less enjoyment in past interests.<br>3:<br>4: Loss of interest in surroundings. Loss of feelings for friends and acquaintances.<br>5:<br>6: Total emotional numbness. Unable to feel anger, sadness, or joy. Complete or painfully perceived loss of emotions for close relatives and friends.                           |
| 8: Pessimistic thoughts       | Includes feelings of guilt, worthlessness, self-reproach, sinfulness, remorse, and doom.                                                                                                                                                              | 0: No pessimistic thoughts.<br>1:<br>2: Occasional thoughts of failure, self-reproach, and self-degradation.<br>3:<br>4: Persistent self-accusations. Clear but still logically reasonable ideas of guilt and sin. Increasing pessimism about the future.<br>5:<br>6: Delusions of ruin, feelings of remorse, or irredeemable sins. Self-accusations that are irrational yet unshakable. |
| 9: Suicidal ideations         | Includes the feeling that life is not worth living, that natural death would be a relief, suicidal thoughts, and                                                                                                                                      | 0: Enjoys life or believes that life must be taken as it comes.<br>1:<br>2: Occasionally feels life is not worth living.                                                                                                                                                                                                                                                                 |



|  |                                                                                      |                                                                                                                                                                                                                                     |
|--|--------------------------------------------------------------------------------------|-------------------------------------------------------------------------------------------------------------------------------------------------------------------------------------------------------------------------------------|
|  | preparations for suicide. Suicide attempts should not directly influence the rating. | 3:<br>4: Would rather be dead. Frequent suicidal thoughts. Suicide is seen as a possible way out, but no specific plans or intentions.<br>5:<br>6: Clear suicidal plans when an opportunity arises. Active preparation for suicide. |
|--|--------------------------------------------------------------------------------------|-------------------------------------------------------------------------------------------------------------------------------------------------------------------------------------------------------------------------------------|

### Scoring and Interpretation

Each item is rated on a **0-6 scale**, with a **total score ranging from 0 to 60**. The higher the total score, the more severe the depression.

- **0-6:** No or minimal depression
- **7-19:** Mild depression
- **20-34:** Moderate depression
- **35-60:** Severe depression

## Synthetic Data Generation

We applied a pre-trained Sentence-BERT model (<https://huggingface.co/sentence-transformers/paraphrase-MiniLM-L6-v2>) to embed the transcriptions of real patient interviews and synthetic data. These embeddings were compared using cosine similarity to assess how closely the synthetic sentences align with the real ones.

The average cosine similarity between the real and synthetic data was 0.61, indicating moderate similarity. The highest similarity was 1, suggesting high similarity between some of the real and synthetic data pairs. The lowest similarity was -0.12, indicating that some synthetic sentences strongly differed from the real data. This suggests that the synthetic data captures a reasonable amount of content similarity to the real data, but it also includes cases where the synthetic sentences strongly differ, likely due to the synthetic data covering extreme severity cases that may not be fully represented in the real dataset.

## Training and Evaluation *MADRS-BERT*

Supplementary Figure 1. (A) Training Loss and (B) Validation Loss.

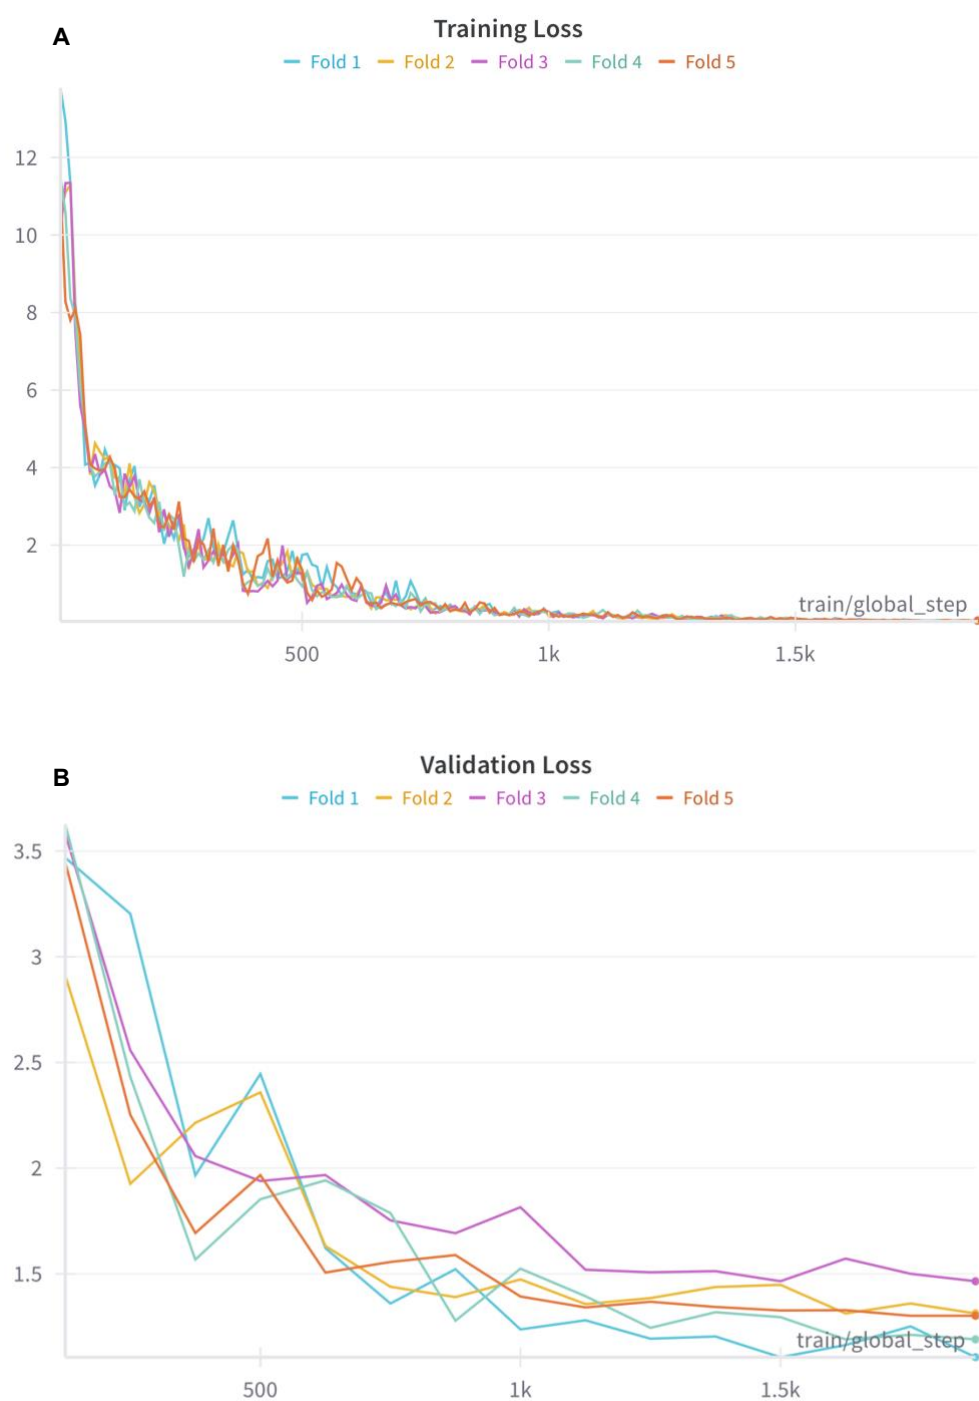

**Supplementary Figure 2. (A) Validation Mean Squared Error (MSE), (B) Validation Mean Absolute Error (MAE), (C) Validation Accuracy strict, and (D) Validation Accuracy flexible**

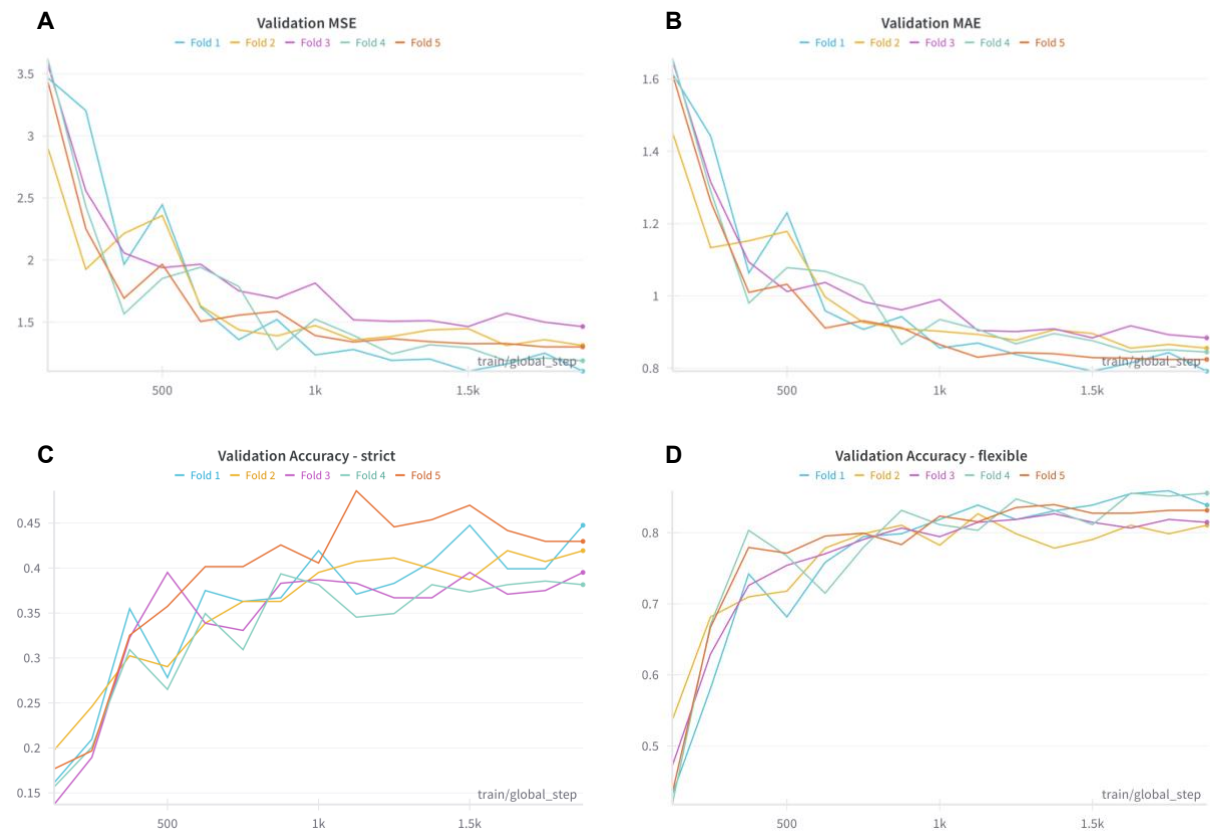

**Supplementary Figure 3. Learning curves for nine MADRS topics under the strict accuracy criterion.** Each line corresponds to one topic. The x-axis indicates the fraction of the dataset used for training. For each fraction, we perform 5-fold cross-validation and plot the mean strict accuracy on the y-axis.

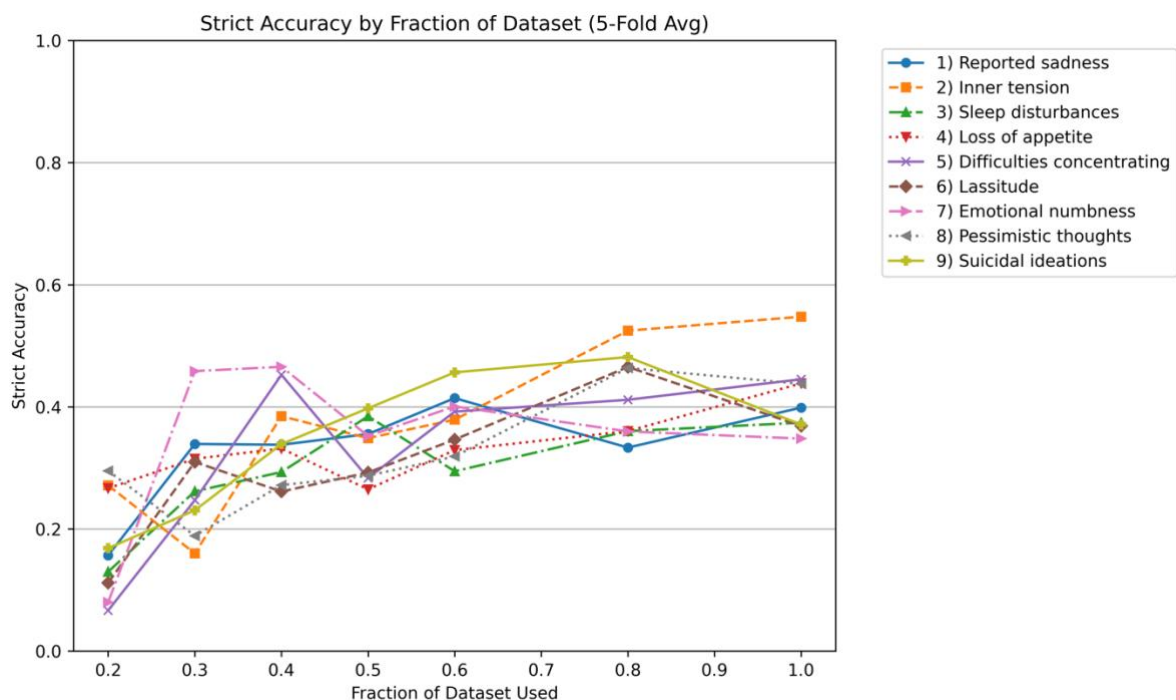

## Classification Performance BERT-base and BERT-base-flexible

**Supplementary Figure 4. Confusion matrices for *BERT-base* model.** The confusion matrices illustrate the classification performances and errors across the nine items using the *BERT-base* model by comparing the predicted (x-axis) versus the actual (y-axis) MADRS scores. The intensity of the colour represents the count of predictions, with darker shades indicating higher values. Diagonale entries represent correctly classified instances, while off-diagonal entries indicate errors.

**Confusion Matrices for Base Model (Strict)**

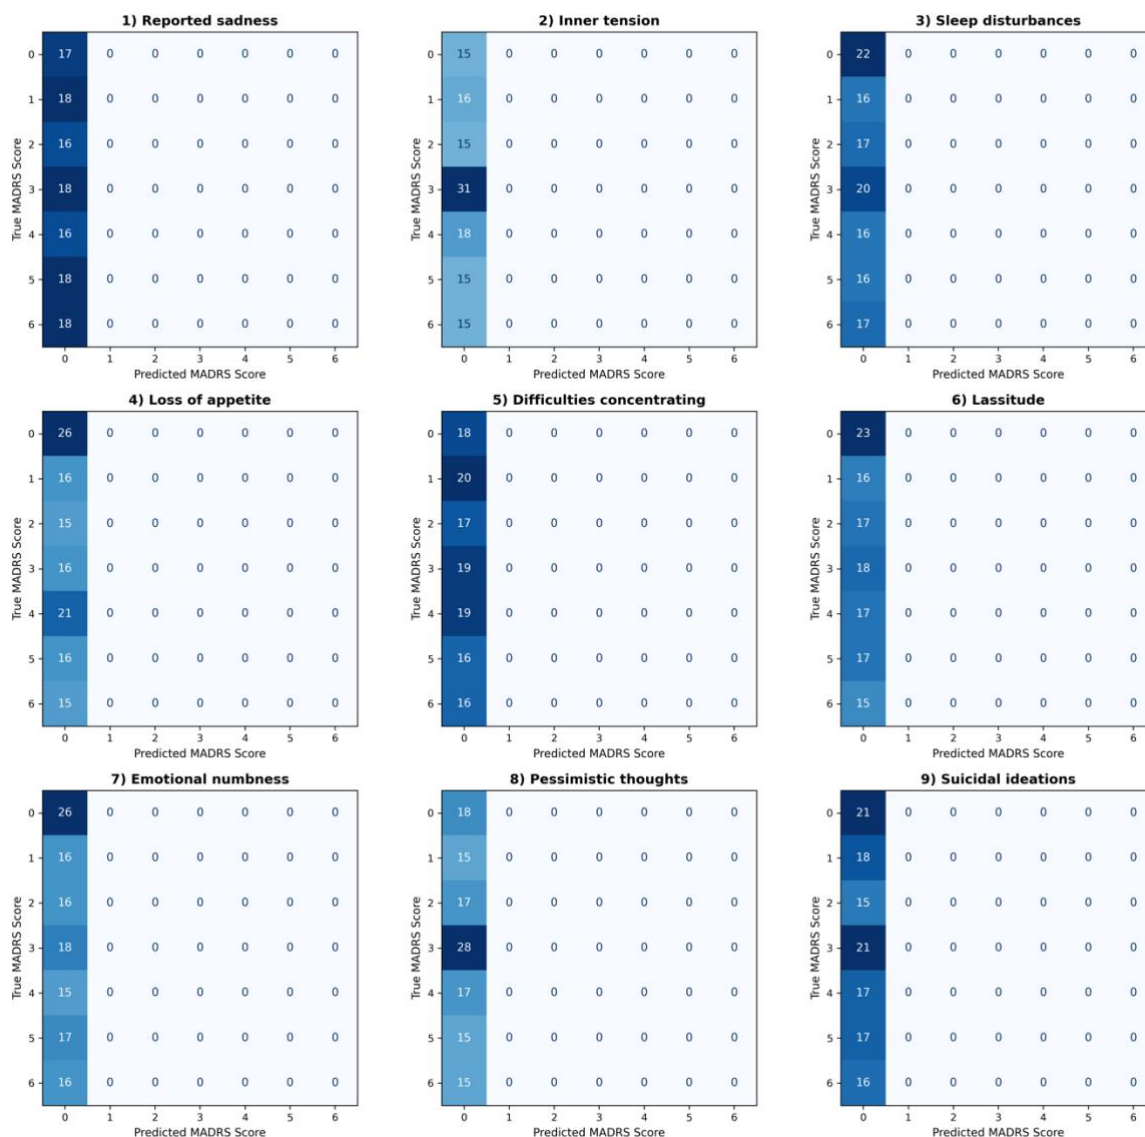

**Supplementary Figure 5. Confusion matrices for *BERT-base-flexible* model.** The confusion matrices illustrate the classification performances and errors across the nine items using the BERT-base model by comparing the predicted (x-axis) versus the true (y-axis) MADRS scores. The intensity of the colour represents the count of predictions, with darker shades indicating higher values. Diagonale entries represent correctly classified scores, while off-diagonal entries indicate errors. The model's performance is shown under the flexible criteria, with predictions within  $\pm 1$  of the true label considered as a correct prediction.

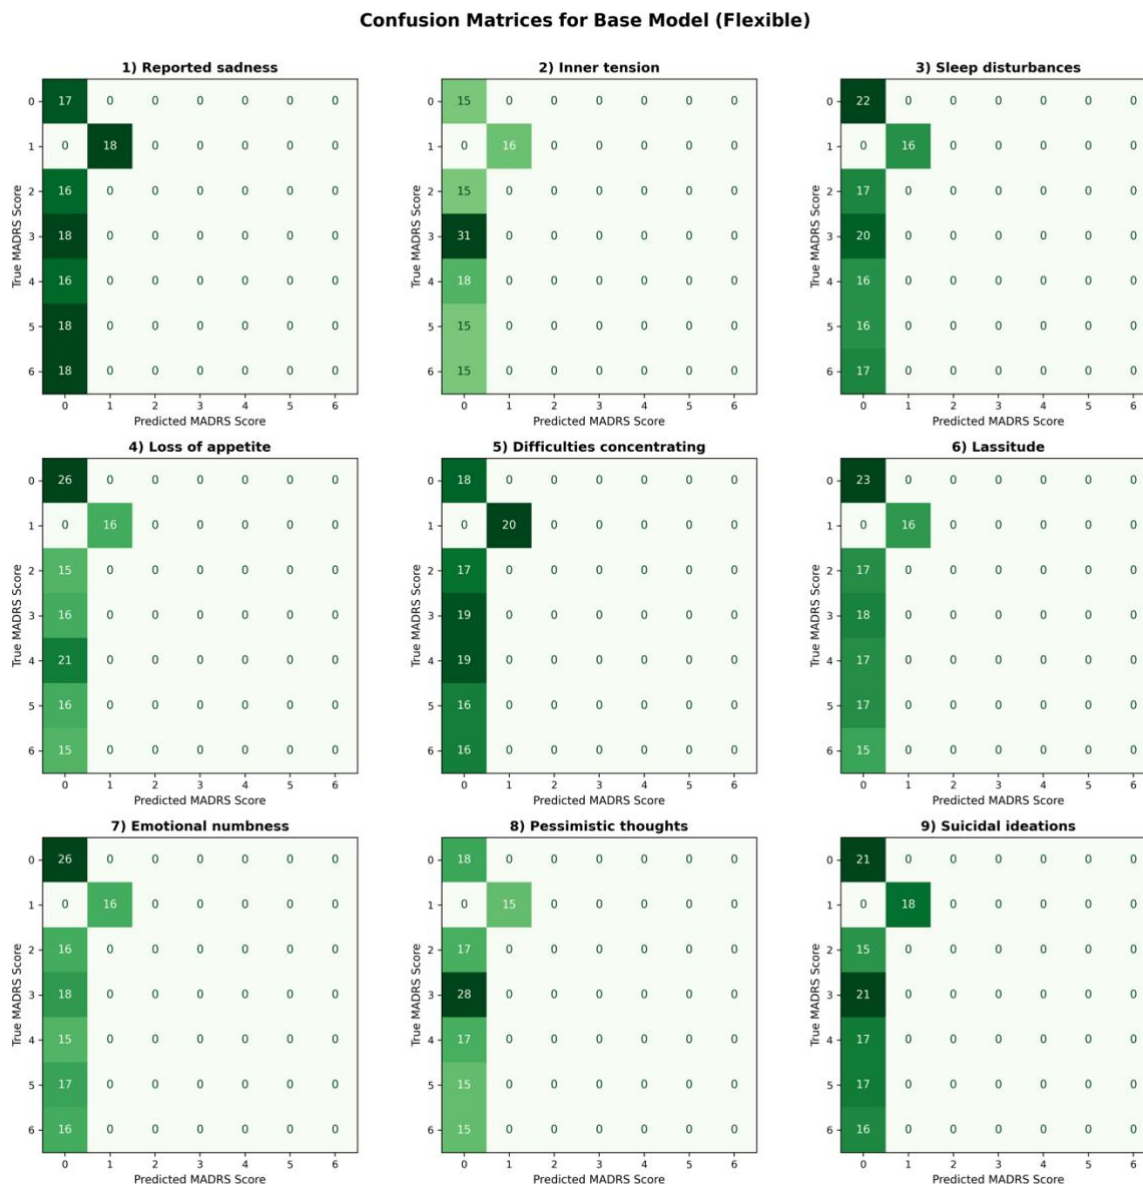

**Supplementary Table 4. Comparison of *BERT-base* and Baseline Predictor (Mean Regression Model) Performance Across MADRS items.** The table reports the Mean Score, Mean Squared Error (MSE), and Mean Absolute Error (MAE) for the baseline predictor and the base model (*BERT-base*) across all nine MADRS items. The baseline predictor assigns the mean MADRS score per topic as the predicted value, serving as a naive statistical reference. MSE and MAE quantify the prediction error, with lower values indicating better performance. Bold numbers highlight the best results across.

| MADRS Item                 | Mean MADRS Score | MSE ↓ (±std) |                  | MAE ↓ (±std) |                  |
|----------------------------|------------------|--------------|------------------|--------------|------------------|
|                            |                  | Baseline     | <i>BERT-base</i> | Baseline     | <i>BERT-base</i> |
| Reported sadness           | 3·0              | 4·1          | 12·6 (±1·28)     | 1·7          | 3·0 (±0·24)      |
| Inner tension              | 3·0              | 3·4          | 11·7 (±2·91)     | 1·5          | 2·9 (±0·44)      |
| Sleep disturbances         | 2·9              | 4·1          | 11·4 (±2·67)     | 1·7          | 2·8 (±0·34)      |
| Loss of appetite           | 2·8              | 4·8          | 11·5 (±2·00)     | 1·8          | 2·7 (±0·32)      |
| Difficulties concentrating | 2·9              | 3·9          | 11·3 (±2·27)     | 1·7          | 2·8 (±0·36)      |
| Lassitude                  | 2·8              | 4·1          | 11·4 (±2·24)     | 1·8          | 2·8 (±0·37)      |
| Emotional numbness         | 2·8              | 4·3          | 11·3 (±2·87)     | 1·8          | 2·7 (±0·49)      |
| Pessimistic thoughts       | 2·9              | 3·6          | 11·5 (±2·78)     | 1·6          | 2·8 (±0·38)      |
| Suicidal ideations         | 2·9              | 4·0          | 11·6 (±1·09)     | 1·7          | 2·8 (±0·16)      |



## Statistical evaluation

When comparing the classification performance between the fine-tuned (*MADRS-BERT*) and base models (*BERT-base*) under strict and flexible evaluation criteria, McNemar’s test for statistical significance showed significantly better accuracy of the 1) *MADRS-BERT-flexible* versus *BERT-base-flexible* across all items ( $P < 0.0001$ ). Likewise, 2) *MADRS-BERT* performed better across all items than *BERT-base* ( $P < 0.0001$ ). These results highlight that fine-tuning significantly improves classification performance under flexible and strict conditions. Moreover, 3) *MADRS-BERT-flexible* performed better across all items than *MADRS-BERT* ( $P < 0.0001$ ), and 4) *BERT-base-flexible* performed better across all items than *BERT-base* ( $P < 0.0001$ ), highlighting that classification performance improves under flexible criteria independently of the model. The contingency tables and results per item can be found in Supplementary Figures 6-9.

**Supplementary Figure 6. Contingency tables comparing *MADRS-BERT* versus *BERT-base* model outcomes across topics.** Each table shows the counts of outcomes classified as where the models were correct versus not correct. The y-axis indicates the outcomes of *BERT-base*, while the x-axis represents the outcomes of *MADRS-BERT*.

**Contingency Tables: MADRS-BERT vs. BERT-base**

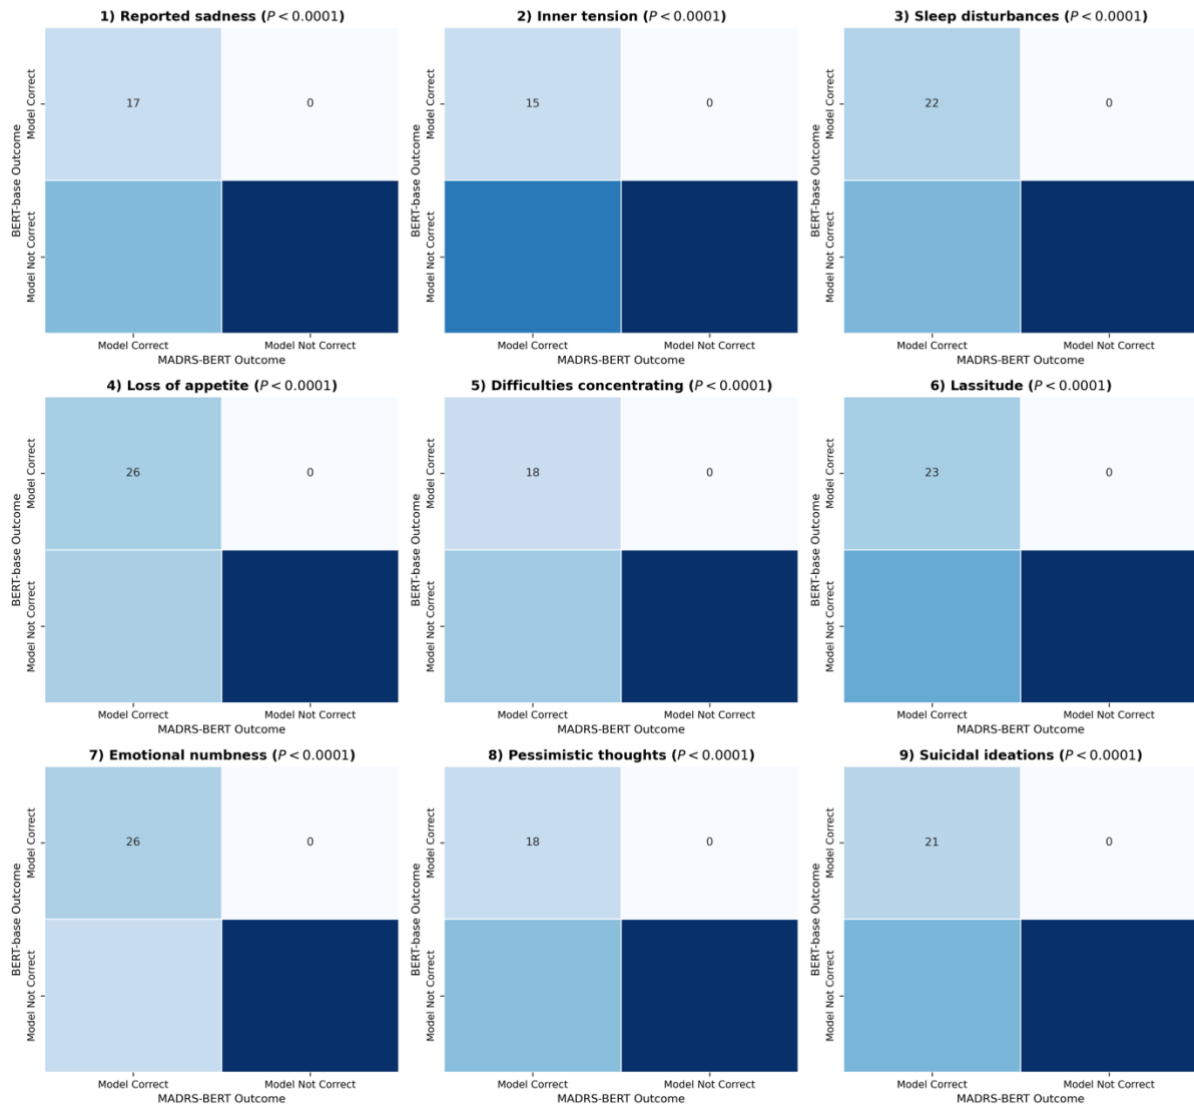

**Supplementary Figure 7. Contingency tables comparing *MADRS-BERT-flexible* versus *MADRS-BERT* model outcomes across topics.** Each table shows the counts of outcomes classified as where the models were correct versus not correct. The y-axis indicates the outcomes of *MADRS-BERT*, while the x-axis represents the outcomes of *MADRS-BERT-flexible*.

**Contingency Tables: MADRS-BERT-flexible vs. MADRS-BERT**

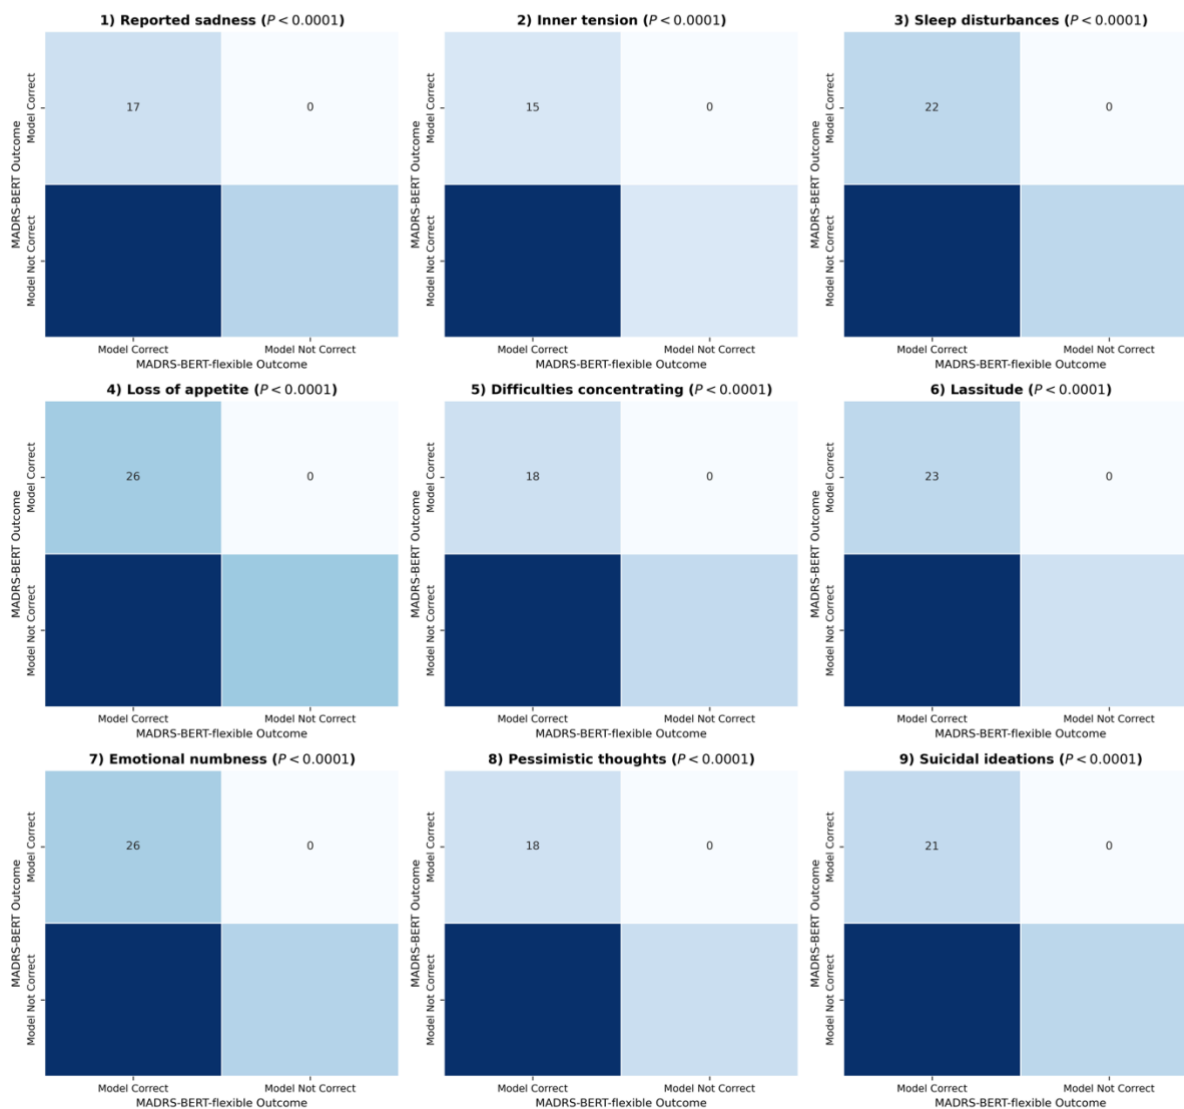

**Supplementary Figure 8. Contingency tables comparing *MADRS-BERT-flexible* versus *BERT-base-flexible* model outcomes across topics.** Each table shows the counts of outcomes classified as where the models were correct versus not correct. The y-axis indicates the outcomes of *BERT-base-flexible*, while the x-axis represents the outcomes of *MADRS-BERT-flexible*.

**Contingency Tables: MADRS-BERT-flexible vs. BERT-base-flexible**

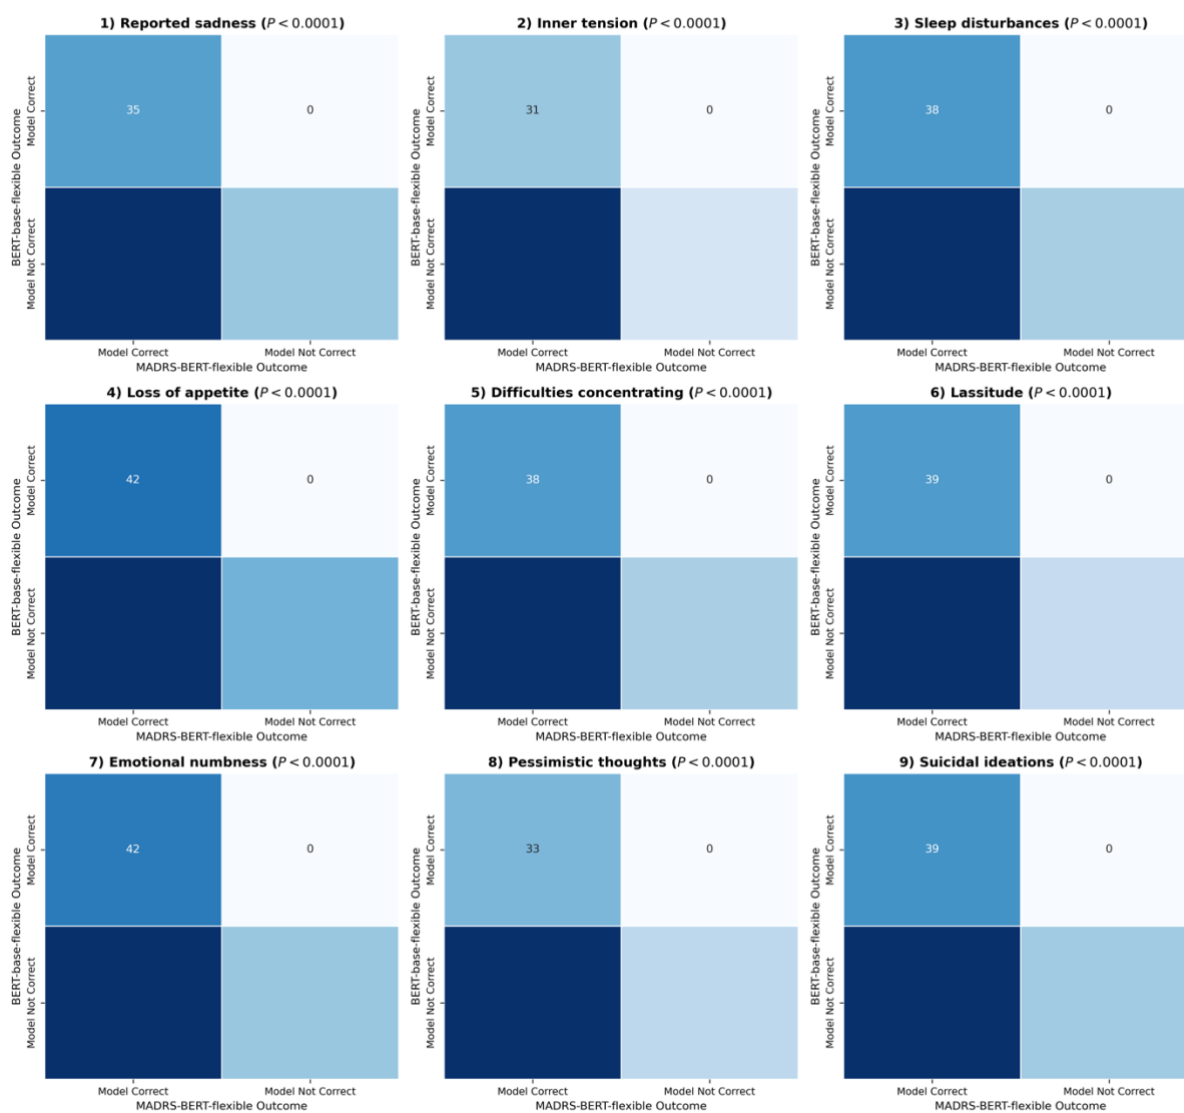

**Supplementary Figure 9. Contingency tables comparing *BERT-base-flexible* versus *BERT-base* model outcomes across topics.** Each table shows the counts of outcomes classified as where the models were correct versus not correct. The y-axis indicates the outcomes of *BERT-base*, while the x-axis represents the outcomes of *BERT-base-flexible*.

**Contingency Tables: *BERT-base-flexible* vs. *BERT-base***

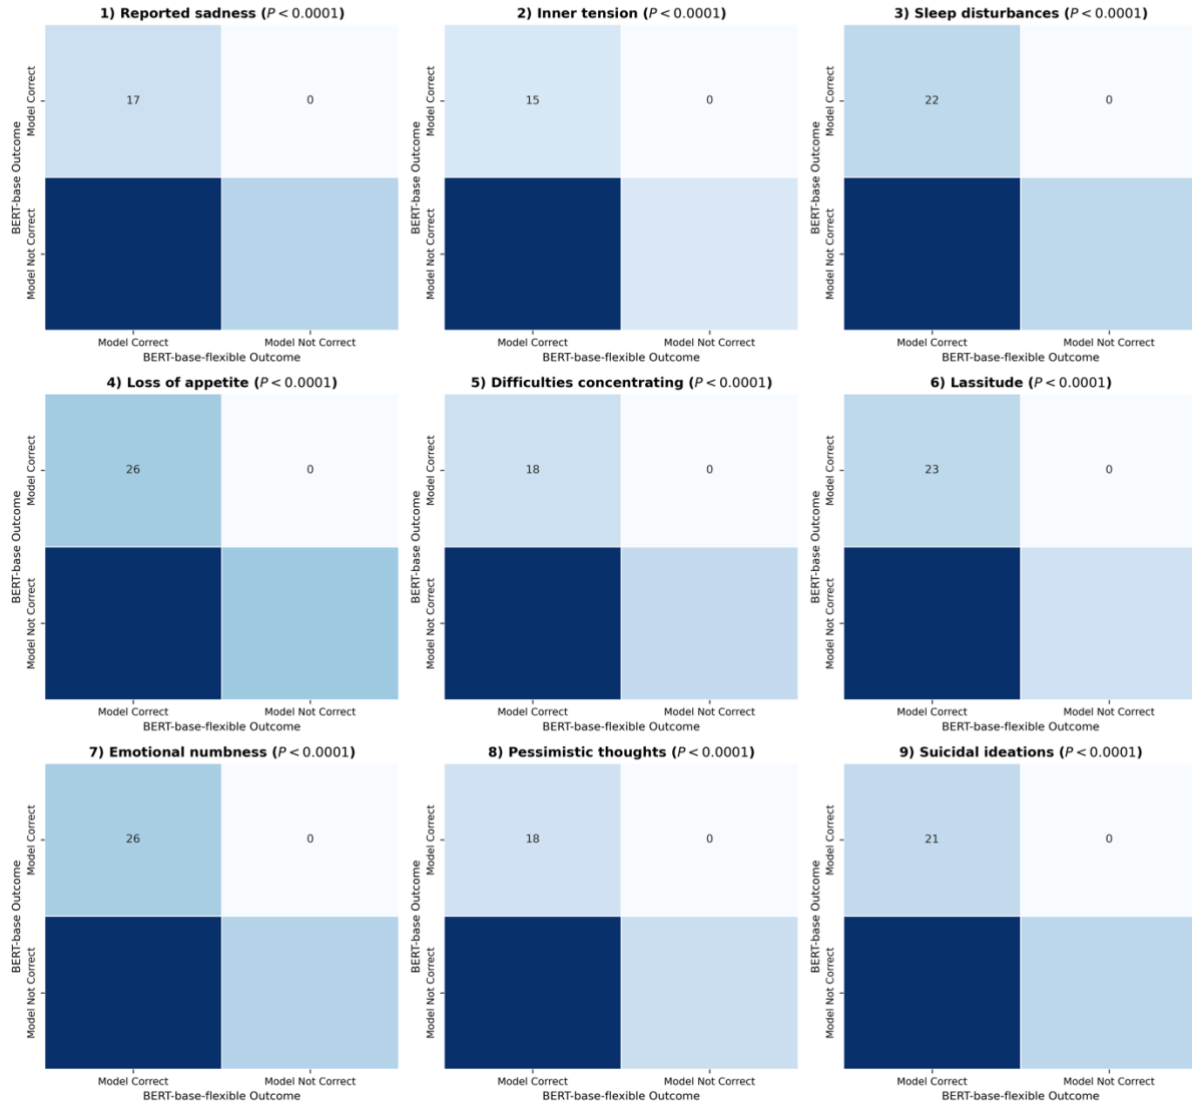

## References

- 1 Montgomery SA, Åsberg M. A New Depression Scale Designed to be Sensitive to Change. *Br J Psychiatry* 1979; **134**: 382–9.
- 2 Kleim B, Graham B, Fihosy S, Stott R, Ehlers A. Reduced Specificity in Episodic Future Thinking in Posttraumatic Stress Disorder. *Clin Psychol Sci* 2014; **2**: 165–73.
- 3 Kleim B, Graham B, Bryant RA, Ehlers A. Capturing intrusive re-experiencing in trauma survivors' daily lives using ecological momentary assessment. *J Abnorm Psychol* 2013; **122**: 998–1009.
